# Supplementary material
Source: MDPI journal article supplement (https://www.mdpi.com/2304-6740/9/8/62)
Supplement: s1 [file s1 › inorganics-1297131-supplementary.pdf]

# Barium Titanium Oxynitride from Ammonia-Free Nitridation of Reduced BaTiO<sub>3</sub>

Hua Guo <sup>1</sup>, Aleksander Jaworski <sup>1</sup>, Zheng Chen <sup>2</sup>, Can Lu <sup>2</sup>, Adam Slabon <sup>1</sup> and Ulrich Häussermann <sup>1,\*</sup>

<sup>1</sup> Department of Materials and Environmental Chemistry, Stockholm University, SE-10691 Stockholm, Sweden; hua.guo@mmk.su.se (H.G.); aleksander.jaworski@mmk.su.se (A.J.); adam.slabon@mmk.su.se (A.S.)

<sup>2</sup> Institute of Inorganic Chemistry, RWTH Aachen University, Landoltweg 1, DE-52074 Aachen, Germany; zheng.chen@ac.rwth-aachen.de (Z.C.); can.lu@ac.rwth-aachen.de (C.L.)

\* Correspondence: ulrich.haussermann@mmk.su.se; Tel.: +46-08-162390

## PXRD analysis of BTOH

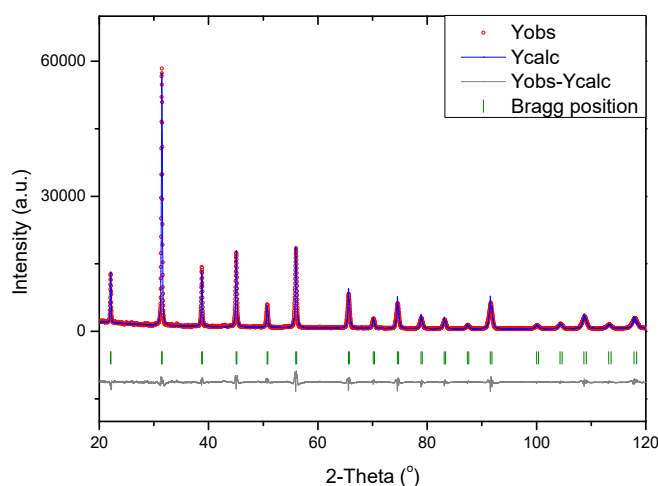

**Figure S1.** Rietveld fit to the PXRD data of the oxyhydride starting material BaTiO<sub>2.60</sub>H<sub>0.08</sub>O<sub>0.32</sub> (BTOH).

**Citation:** Guo, H.; Jaworski, A.; Chen, Z.; Lu, C.; Slabon, A.; Häussermann, U. Barium Titanium Oxynitride from Ammonia-Free Nitridation of Reduced BaTiO<sub>3</sub>. *Inorganics* **2021**, *9*, 62. <https://doi.org/10.3390/inorganics9080062>

Academic Editor: Hiroshi Kageyama

Received: 28 June 2021

Accepted: 31 July 2021

Published: 5 August 2021

| Sample | Unit cell parameters (Å) | Unit cell volume (Å <sup>3</sup> ) | χ <sup>2</sup> | R <sub>Bragg</sub> | R <sub>F</sub> |
|--------|--------------------------|------------------------------------|----------------|--------------------|----------------|
| BTOH   | 4.0220 (2)               | 65.062 (1)                         | 9.86           | 4.42               | 2.73           |

**Publisher's Note:** MDPI stays neutral with regard to jurisdictional claims in published maps and institutional affiliations.

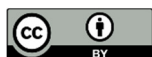

**Copyright:** © 2021 by the authors. Licensee MDPI, Basel, Switzerland. This article is an open access article distributed under the terms and conditions of the Creative Commons Attribution (CC BY) license (<http://creativecommons.org/licenses/by/4.0/>).

### <sup>1</sup>H-MAS NMR analysis of BTOH

<sup>1</sup>H MAS NMR has been used earlier for the analysis of metal hydride reduced BaTiO<sub>3</sub> samples[1]. <sup>1</sup>H MAS NMR is especially useful for unambiguously determining the hydridic H content, which then allows the deduction of O defect concentrations from TGA measurements. Importantly, protonic H from (surface) hydroxyl and hydridic H as part of the bulk structure can be discriminated as positive and negative chemical shift contributions, respectively, in the spectra. Hydridic H typically expresses itself as a single broad resonance peak at negative chemical shift whereas protonic resonances at ~1 ppm and in the region 6 – 7 ppm correspond to surface OH species and secondary water, respectively. The amount of hydridic H in reduced samples can be quantified by relating the <sup>1</sup>H NMR signal of the BaTiO<sub>3</sub> starting material to that of adamantane (C<sub>10</sub>H<sub>16</sub>) in the same rotor volume and under identical experimental conditions. From the density and molecular weights of adamantane (1.08g/cm<sup>3</sup>, 136.23 g/mol) and BaTiO<sub>3</sub> (6.02 g/cm<sup>3</sup>, 233.2 g/mol) a molar ratio H/BaTiO<sub>3</sub> can be established for reduced samples. With the knowledge of the hydridic H concentration, the corresponding weight increase for BaTiO<sub>3-x</sub>H<sub>x</sub> + 0.75x O<sub>2</sub> → BaTiO<sub>3</sub> + 0.5x H<sub>2</sub>O can be calculated. The difference to the actual weight increase in the TG experiment is then attributed to the simultaneous presence of O vacancies, x<sub>□</sub>, see Table 1.

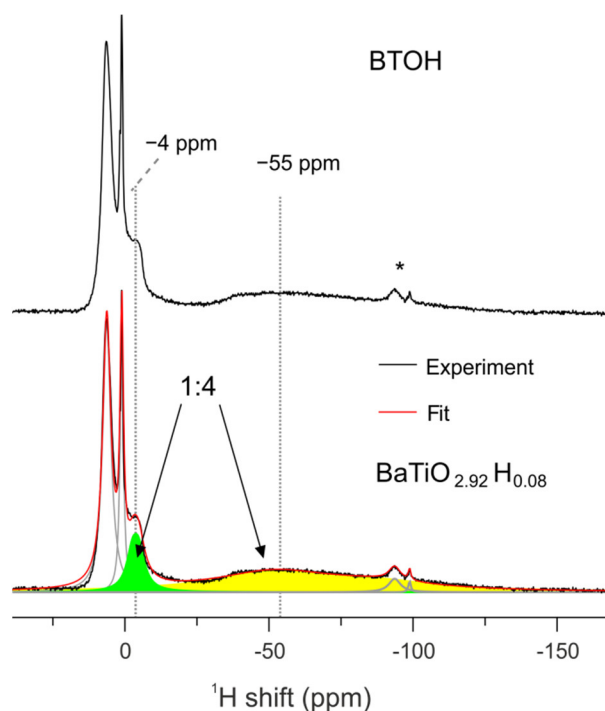

**Figure S2:** <sup>1</sup>H MAS NMR spectrum of BTOH. The proton signal is deconvoluted into a protonic (positive parts per million) and hydridic (negative parts per million) part [1]. The hydridic contribution in turn constitutes two contributions, one centered at -4 ppm and one at -55 ppm, with a ratio of 1:4 (according to the integrated proton signal intensity). The occurrence of two hydridic environments in reduced BaTiO<sub>3</sub> is highly unusual and perhaps relates to the large O defect concentration of BTOH. Previously sharp signals with small negative shifts have been observed in reduced samples with high defect concentration (e.g. when using NaBH<sub>4</sub> as reducing agent [1]). One may speculate that the two H<sup>-</sup> environments in BTOH are associated with a different number and/or different arrangement of O defects around H<sup>-</sup>.

## Additional TG/DSC analysis

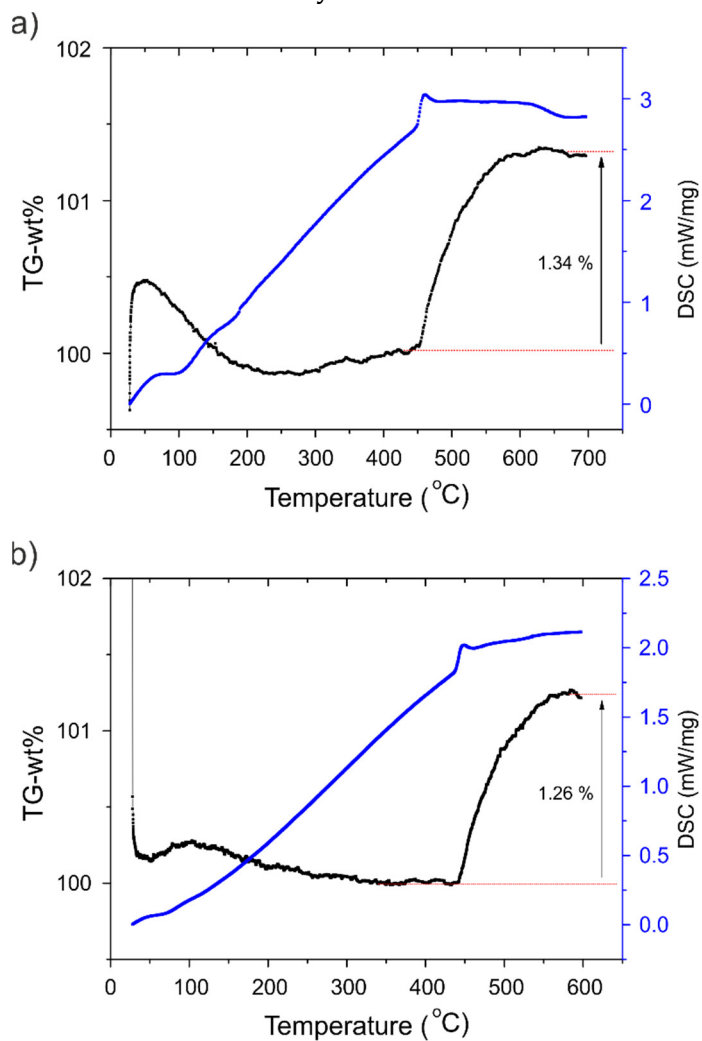

**Figure S3.** Simultaneously measured TG and DSC traces for BTOH upon heating under a dry N<sub>2</sub> stream up to 700 °C with heating rate 10 °C/min (a) and to 600 °C with a heating rate 5 °C/min (b).

## PXRD analysis of BTON

**Table S1.** Refinement result summary for BTON samples using the tetragonal structure model

| Sample      | Unit cell parameters (Å)        | Unit cell volume (Å <sup>3</sup> ) | $\chi^2$ | R <sub>Bragg</sub> | R <sub>F</sub> |
|-------------|---------------------------------|------------------------------------|----------|--------------------|----------------|
| BTON-500-0h | a= 4.0121 (2)<br>c= 4.0177 (3)  | 64.672 (2)                         | 4.59     | 4.45               | 3.30           |
| BTON-500-2h | a= 4.0074 (4)<br>c= 4.0202 (6)  | 64.562 (3)                         | 4.30     | 6.09               | 4.48           |
| BTON-600-0h | a= 4.0103 (7)<br>c= 4.0192 (11) | 64.639 (6)                         | 3.79     | 8.89               | 7.34           |
| BTON-600-2h | a= 4.0086 (3)<br>c= 4.0180 (5)  | 64.565 (3)                         | 4.32     | 5.34               | 3.62           |
| BTON-600-6h | a= 4.0085 (3)<br>c= 4.0184 (2)  | 64.568 (2)                         | 4.25     | 5.45               | 3.66           |

**Table S2.** Refinement result summary for BTON samples using the cubic structure model

| Sample      | Unit cell parameters (Å) | Unit cell volume (Å <sup>3</sup> ) | $\chi^2$ | R <sub>Bragg</sub> | R <sub>F</sub> |
|-------------|--------------------------|------------------------------------|----------|--------------------|----------------|
| BTON-500-0h | 4.0137 (1)               | 64.659 (1)                         | 3.96     | 3.68               | 2.70           |
| BTON-500-2h | 4.0119 (2)               | 64.575 (1)                         | 4.87     | 5.25               | 4.20           |
| BTON-600-0h | 4.0131 (3)               | 64.630 (2)                         | 3.71     | 7.10               | 5.86           |
| BTON-600-2h | 4.0118 (3)               | 64.569 (2)                         | 5.07     | 4.90               | 3.52           |
| BTON-600-6h | 4.0111 (2)               | 64.533 (2)                         | 4.90     | 4.71               | 3.25           |

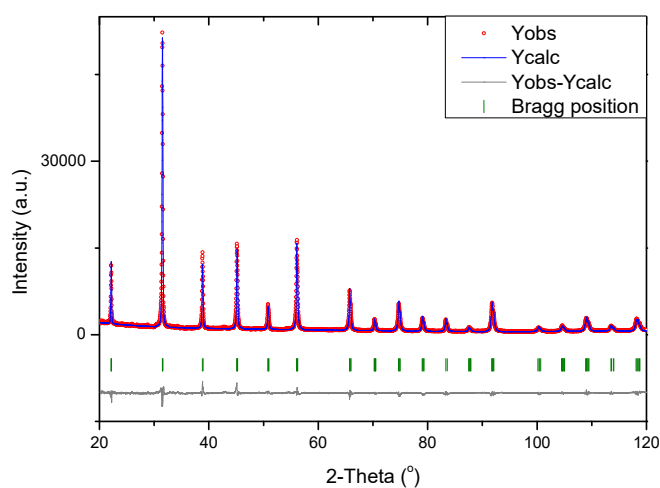**Figure S4.** Refinement of BTON-500C-0h as tetragonal phase.

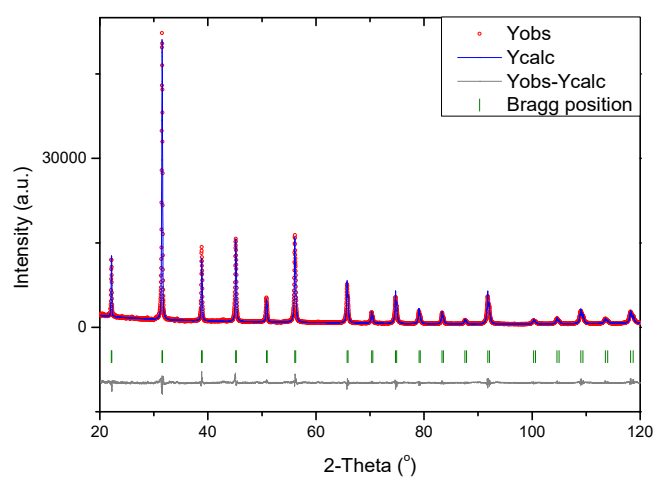

**Figure S5.** Refinement of BTON-500C-0h as cubic phase.

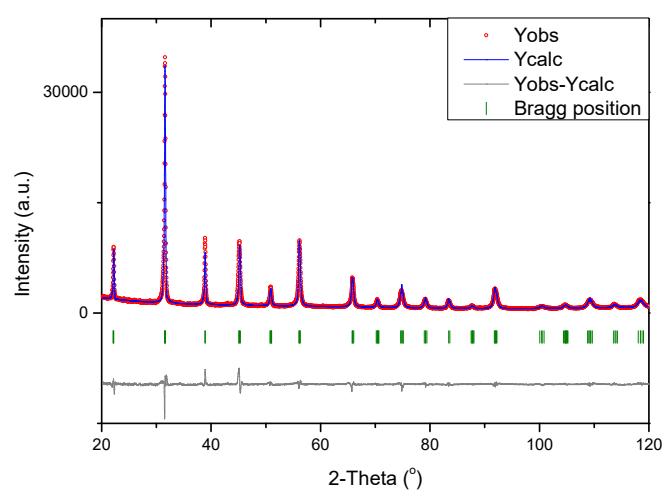

**Figure S6.** Refinement of BTON-500C-2h as tetragonal phase.

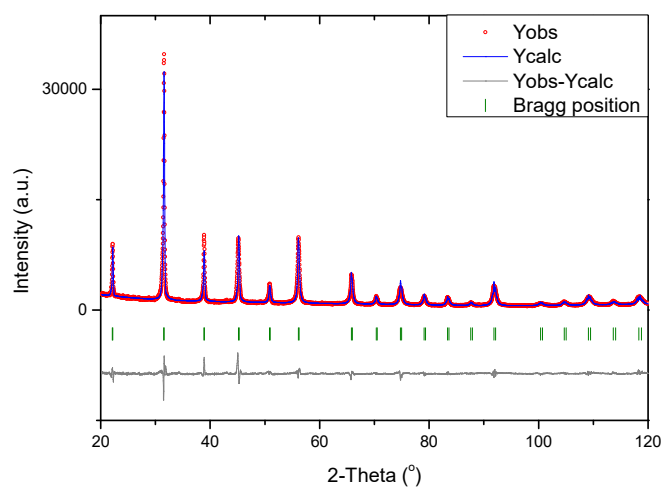

**Figure S7.** Refinement of BTON-500C-2h as cubic phase.

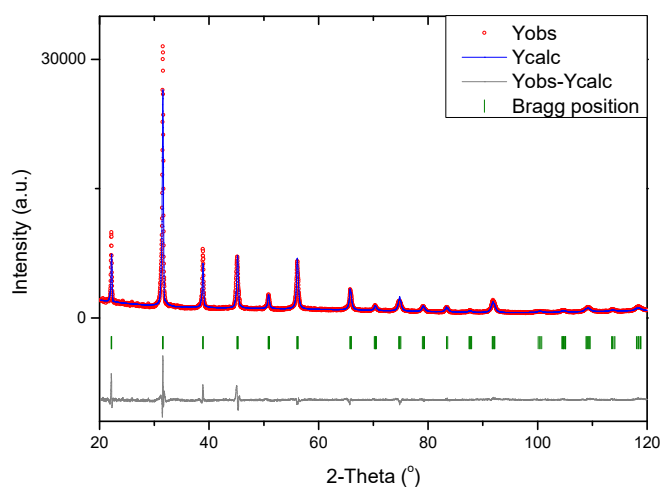

Figure S8. Refinement of BTON-600C-0h as tetragonal phase.

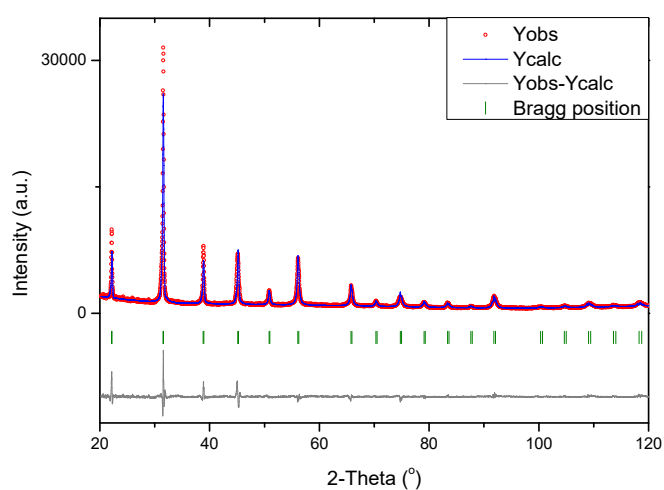

Figure S9. Refinement of BTON-600C-0h as cubic phase.

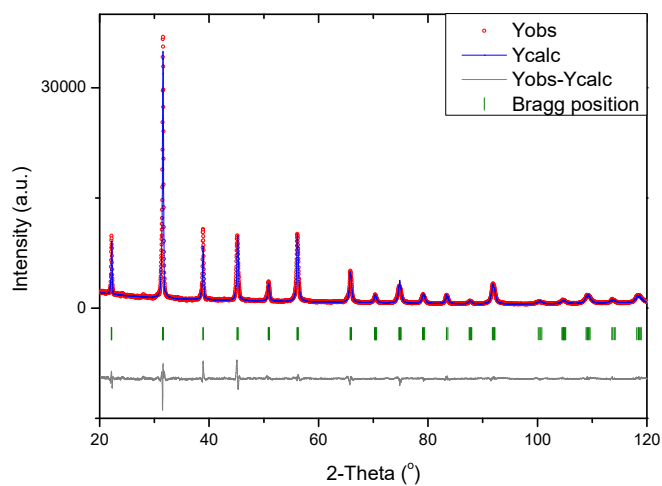

Figure S10. Refinement of BTON-600C-2h as tetragonal phase.

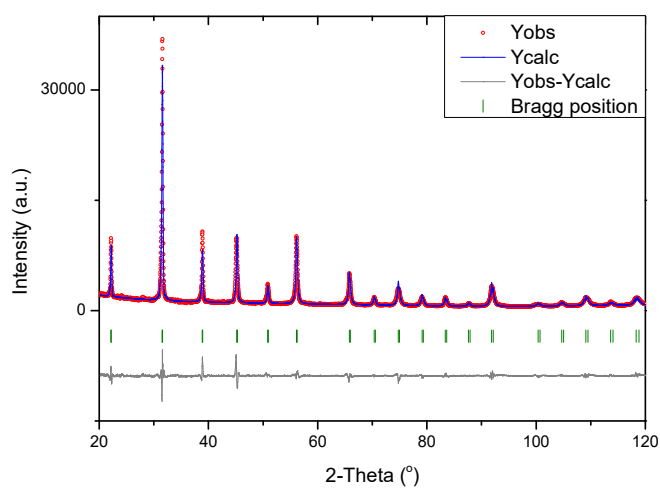

**Figure S11.** Refinement of BTON-600C-2h as cubic phase.

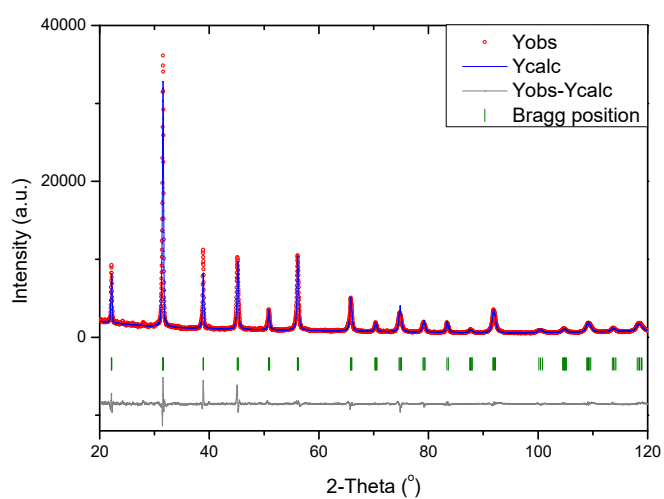

**Figure S12.** Refinement of BTON-600C-6h as tetragonal phase.

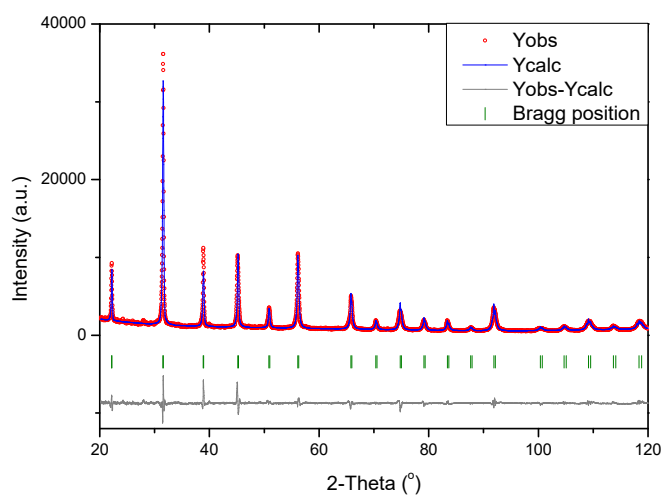

**Figure S13.** Refinement of BTON-600C-6h as cubic phase.

### Band gap analysis

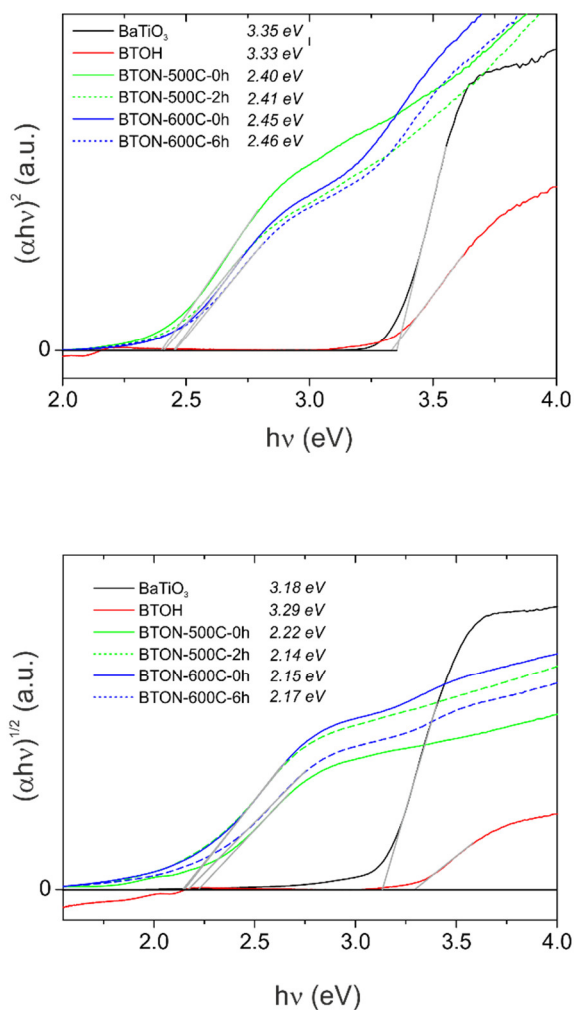

**Figure S14.** Tauc plots for direct (upper figure) and indirect (lower figure) band gap evaluation of BaTiO<sub>3</sub>, BTOH, BTON-500C-0h, BTON-500C-2h, BTON-600C-0h, and BTON-600C-6h.

### References

1. Nedumkandathil, R.; Jaworski, A.; Grins, J.; Bernin, D.; Karlsson, M.; Eklof-Osterberg, C.; Neagu, A.; Tai, C.-W.; Pell, A.J.; Haussermann, U. Hydride Reduction of BaTiO<sub>3</sub> - Oxyhydride Versus O Vacancy Formation. *ACS OMEGA* **2018**, *3*, 11426–11438, doi:10.1021/acsomega.8b01368.
